# Supplementary material for: Transcranial ultrasound stimulation of the human motor cortex
Source: PubMed Central journal article supplement (PMC8637484; doi:10.1016/j.isci.2021.103429), 2021-11-13
Supplement: mmc1.pdf [file mmc1.pdf]

**iScience, Volume 24**

**Supplemental information**

**Transcranial ultrasound stimulation  
of the human motor cortex**

**Yi Zhang, Liyuan Ren, Kai Liu, Shanbao Tong, Ti-Fei Yuan, and Junfeng Sun**

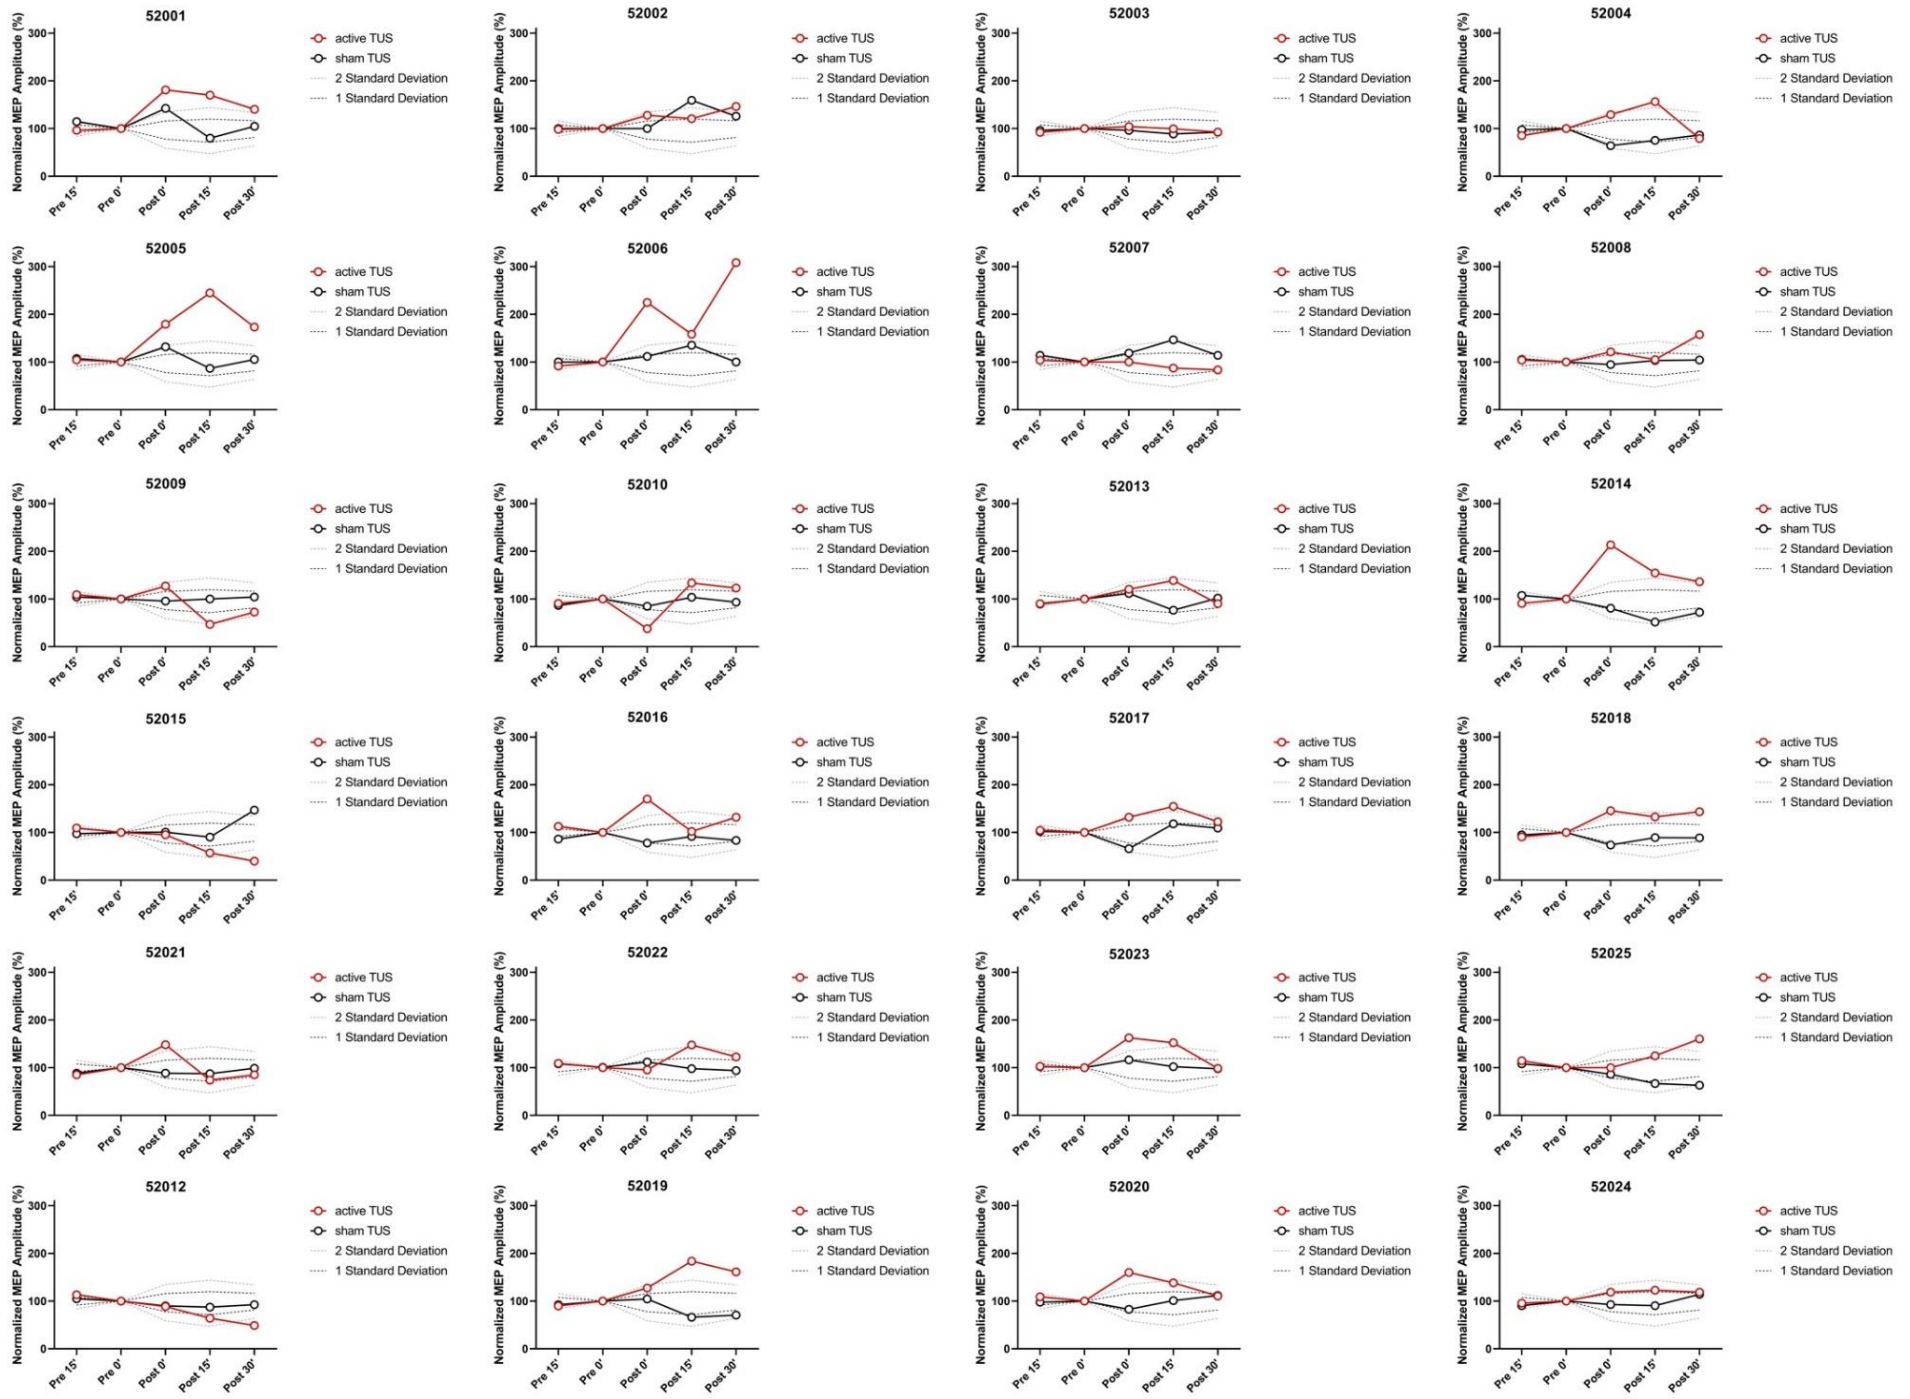

**Figure S1. Individual MEP amplitudes for rTUS in five time point, Related to Results Section.** The black dash line: 1 standard deviation; the grey dash line: 2 standard deviations. Related to Figure 2 and 4.

**Figure S2. The extracranial sound intensity in free water is measured by hydrophone (NH1000 Needle Hydrophone-1.0mm, Precision Acoustics, UK) in water tank, and compared with the simulation results, Related to STAR Methods.** The extracranial (simulated) ultrasound was calculated by an acoustic simulation toolbox, k-Wave (Treeby and Cox, 2010). We used the MRI data of one typical subject in another MRI study to segment the scalp, skull, and brain tissues for numerical simulation. The segmented tissue layers were regarded as a homogeneous tissue mask with material properties such as attenuation coefficient, sound velocity and density shown in Table S2 (Mueller et al., 2016a). (A) The simulated  $I_{SPPA}$  in free water,  $I_{SPPA}$  at the focus is  $8.020 \text{ W/cm}^2$ . (B) The measured  $I_{SPPA}$  in free water,  $I_{SPPA}$  at the focus is  $8.05 \text{ W/cm}^2$ , focal length:  $39.7 \text{ mm}$ . Blue line: acoustic axial. Black line: the border of the full width at half maximum (FWHM) contour. White spot: markers at the centroid of the contours. Related to Figure 1.

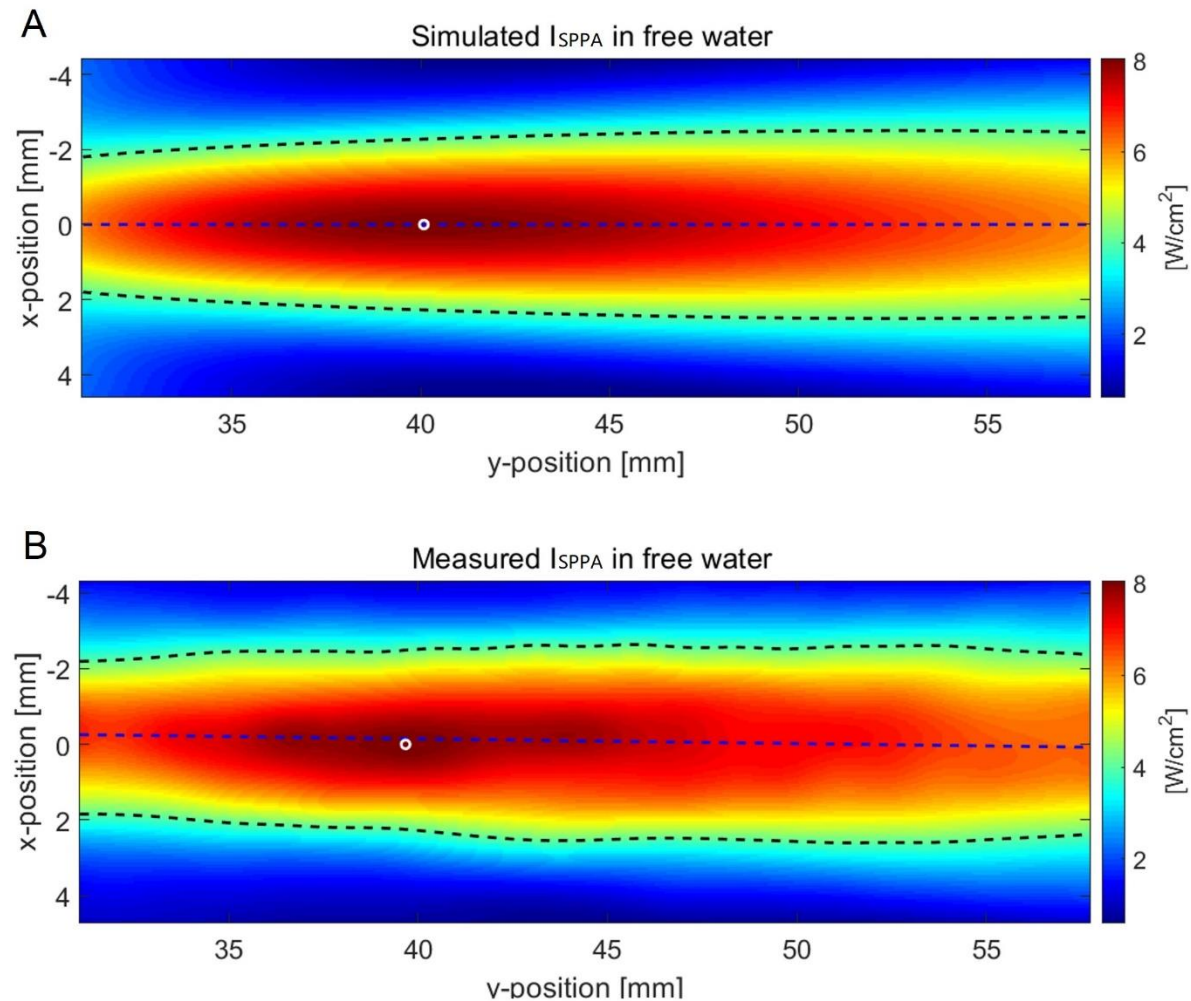

**Table S2. Material properties for rTUS simulation, Related to STAR Methods.**

| Material     | Speed of sound<br>(m/s) | Density<br>(kg/m <sup>3</sup> ) | Acoustic<br>impedance<br>(Pa·s/m) | Attenuation<br>coefficient (Np/m) | Thermal<br>conductivity<br>(W·°C <sup>-1</sup> ·m <sup>-1</sup> ) | Heat capacity<br>(J·Kg <sup>-1</sup> ·°C <sup>-1</sup> ) |
|--------------|-------------------------|---------------------------------|-----------------------------------|-----------------------------------|-------------------------------------------------------------------|----------------------------------------------------------|
| Water        | 1503                    | 999.5                           | 1.48e6                            | 0.02                              | 0.595                                                             | 4186                                                     |
| Scalp        | 1550                    | 1030                            | 1.60e6                            | 0.92                              | 0.528                                                             | 3640                                                     |
| Skull        | 2300                    | 1912                            | 4.40e6                            | 81                                | 0.43                                                              | 1440                                                     |
| Brain tissue | 1550                    | 1030                            | 1.60e6                            | 0.92                              | 0.528                                                             | 3640                                                     |

CSF: cerebrospinal fluid. The extracranial (measured) ultrasound is measured in water by hydrophone (NH1000 Needle Hydrophone-1.0mm, Precision Acoustics, UK). The extracranial (simulated) ultrasound and the intracranial (simulated) ultrasound was calculated by an acoustic simulation toolbox, k-Wave (Treeby and Cox, 2010). We used the MRI data of one typical subject in another MRI study to segment the scalp, skull, and brain tissues for numerical simulation. The segmented tissue layers were regarded as a homogeneous tissue mask with material properties such as attenuation coefficient, sound velocity and density shown in Table S2 (Mueller et al., 2016b).

**Table S3. Ultrasonic intensity parameters at the target position, Related to STAR Methods.**

|                             | 5% DC, PRF = 100 Hz, SD = 500 ms |                                        |                                        |               |
|-----------------------------|----------------------------------|----------------------------------------|----------------------------------------|---------------|
|                             | Pressure (KPa)                   | I <sub>SPTA</sub> (W/cm <sup>2</sup> ) | I <sub>SPPA</sub> (W/cm <sup>2</sup> ) | MI (unitless) |
| Extracranial<br>(Measured)  | 492                              | 0.403                                  | 8.053                                  | 0.696         |
| Extracranial<br>(Simulated) | 491                              | 0.401                                  | 8.020                                  | 0.694         |
| Intracranial<br>(Simulated) | 297                              | 0.142                                  | 2.846                                  | 0.420         |

DC: duty cycle; PRF: pulse repetition frequency; SD: sonication duration; I<sub>SPTA</sub>: the spatial-peak temporal-average Intensity; I<sub>SPPA</sub>: the spatial-peak pulse average intensity; MI: Mechanical Index.
